# Supplementary material
Source: PubMed Central journal article supplement (PMC6304008)
Supplement: rsfs20180050supp1.pdf [file rsfs20180050supp1.pdf]

In[ ]:=

# Monte Carlo simulations of coherent backscattering (CBS) in anisotropic media

This Mathematica code has been used to generate the results that can be found in the paper “Coherent backscattering of light by an anisotropic biological network” by Jacucci et al.

In[ ]:=

## Definition of the simulation parameters

```
ClearAll["Global`*"];
nWalkers = 1; (*N° of photons used*)
lowerCut = 1;
thickness = 7; (*Sample thickness*)
 $\gamma$  = 1.4; (*XY components of the TMFP*)
a = 0.725; (*Anisotropy parameter*)
 $\gamma_z$  =  $\gamma * a$ ; (*Z component of the TMFP*)
scatteringorder =  $\left(\frac{\text{tagliocamminosup}}{\gamma_z}\right)^2$ ;
(*Parameter that you can tune to understand the
influence of the scattering order on the interference*)
indexWalker = 0;
indexReflected = 0;
indexTransmitted = 0;
indexOut = 0;
indexSingle = 0;
indexBouncedR = 0;
indexBouncedT = 0;
list $\alpha$  = Table[0, {nWalkers}];
list $\alpha$ 2 = Table[0, {nWalkers}];
listr = Table[0, {nWalkers}];
listz = Table[0, {nWalkers}];
values = Join[Range[-10, -10, 1], Range[1, 1, 1]];
```

---

In[ ]:= **Calculation of R for  
internal reflections. More  
details can be found here**

---

Out[ ]:= **Calculation of R for  
internal reflections. More  
details can be found here**

```
In[ ]:= nc = 1.55; (*Chitin refractive index*)
α =  $\frac{nc^2 - 1}{nc^2 + 2}$ ;
n[f_] =  $\sqrt{\frac{1 + 2 f \alpha}{1 - f \alpha}}$ ; (*Effective refractive index,
MG's theory, from Eq (10) of Soukolis et al.*)
n1 = n[0.45]; (*Chitin filling fraction in the white beetle,
from Wilts et al.*)
n2 = 1;

Rs[θ_] = Abs[ $\left( n1 \cdot \text{Cos}[\theta] - n2 \cdot \sqrt{1 - \left(\frac{n1}{n2} \cdot \text{Sin}[\theta]\right)^2} \right) /$ 
 $\left( n1 \cdot \text{Cos}[\theta] + n2 \cdot \sqrt{1 - \left(\frac{n1}{n2} \cdot \text{Sin}[\theta]\right)^2} \right)^2$ ]; (*Fresnel's coefficients*)
Rp[θ_] = Abs[ $\left( -n2 \cdot \text{Cos}[\theta] + n1 \cdot \sqrt{1 - \left(\frac{n1}{n2} \cdot \text{Sin}[\theta]\right)^2} \right) /$ 
 $\left( n2 \cdot \text{Cos}[\theta] + n1 \cdot \sqrt{1 - \left(\frac{n1}{n2} \cdot \text{Sin}[\theta]\right)^2} \right)^2$ ];
R[θ_] =  $\frac{Rs[\theta] + Rp[\theta]}{2}$ ;
Ru[θ_] =  $\frac{Rs[\theta] + Rp[\theta]}{2}$ ;
c1 = NIntegrate[Ru[θ] * Sin[θ] * Cos[θ], {θ, 0,  $\frac{\pi}{2}$ }, MaxRecursion → 100];
c2 = NIntegrate[Ru[θ] * Sin[θ] * (Cos[θ])^2, {θ, 0,  $\frac{\pi}{2}$ }, MaxRecursion → 100];
Ravg =  $\frac{3 c2 + 2 c1}{3 c2 - 2 c1 + 2}$ ;
```

---

## In[\*]:= Functions used in the main loop to discriminate the photons

```

In[*]:= doS1[] :=
  (*Single scattered photons. They do not contribute to the CBS effect*)
  indexSingle++;
  Break[];
  );

doS2[] := (*Photons scattered more than the scattering order decided*)
  indexWalker++;
  indexOut++;
  Break[];
  );

doRef[] :=
  (
  (*Photons that contributes to the CBS: we want to calculate the
  distance between the first and the last scattering positions*)
  lastPoint = oldPoint;
  outPoint = currentPoint;
  delta = firstPoint - lastPoint;

  If[
    firstPoint == lastPoint, Break[],
    lista[[indexWalker]] =
    ArcSin[delta[[3]] / (√(delta[[1]]2 + delta[[2]]2 + delta[[3]]2))];
    listr[[indexWalker]] =
    √(((firstPoint[[1]] - lastPoint[[1]])2 + (firstPoint[[2]] - lastPoint[[2]])2 +
    (firstPoint[[3]] - lastPoint[[3]])2);
    listz[[indexWalker]] = outPoint[[3]];
    indexWalker++;
    indexReflected ++;
    Break[];
  ]
  );

doTra[] := (*Photons transmitted*)
  lastPoint = oldPoint;
  indexWalker++;
  indexTransmitted ++;
  Break[];
  );

```

```

doSpecR[] := (*Photons reflected at the entrance
  surface of the material (z=0) back in the material*)
  indexBouncedR++;
  lastPoint = oldPoint;
  outPoint = currentPoint;
  delta2 = lastPoint - outPoint;

  intercept =
RegionCentroid[RegionIntersection[InfiniteLine[{lastPoint, outPoint}],
  InfinitePlane[{{0, 0, 0}, {0, 1, 0}, {1, 0, 0}}]]];
  rt = ReflectionTransform[{delta2[[1]], delta2[[2]], 0},
intercept];
  specular = rt[lastPoint];
  specular2 = - (γz) * Log[RandomReal[]];
specularPoint =
  RegionCentroid[RegionIntersection[InfiniteLine[{intercept, specular}],
  InfinitePlane[{{0, 0, specular2}, {0, 1, specular2}, {1, 0, specular2}}]]];
currentPoint = specularPoint

);

doSpecT[] := (*Photons reflected at the exit
  surface of the material (z=thickness) back in the material*)
  indexBouncedT++;
  lastPoint = oldPoint;
  outPoint = currentPoint;
  delta2 = lastPoint - outPoint;
  intercept =
RegionCentroid[RegionIntersection[InfiniteLine[{lastPoint, outPoint}],
  InfinitePlane[{{0, 0, thickness}, {0, 1, thickness}, {1, 0, thickness}}]]];
  rt = ReflectionTransform[{delta2[[1]], delta2[[2]], 0},
intercept];
  specular = rt[lastPoint];
  specular2 = thickness + (γz) * Log[RandomReal[]];
specularPoint =
  RegionCentroid[RegionIntersection[InfiniteLine[{intercept, specular}],
  InfinitePlane[{{0, 0, specular2}, {0, 1, specular2}, {1, 0, specular2}}]]];
currentPoint = specularPoint;

);

```

---

*In[]:=* **Main loop where the  
random walk is performed**

```

Timing[
  While[
    indexWalker <= nWalkers,
    firstPoint = {0, 0, -(γz) * Log[RandomReal[]]};
    (*Depth of 1st scatter: probability sampled
    using an inverse sampling technique of exp(-r/γ )/γ*)
    oldPoint = firstPoint;
    currentPoint = {0, 0, 0};
    currentOrder = 1;
    lastPoint = {0, 0, 0};
    Ravg = 0;

    While[True, (*While loop,
    the conditions to stop it are in the following Ifs*)
      φ = Random[Real, {0, π}];
      ψ = Random[Real, {0, 2 π}];
      δxy = -γ * Log[RandomReal[]];
      δz = a * δxy;

      randomStep =
      {δxy * √(1 - Cos[φ]2) * Cos[ψ], δxy * √(1 - Cos[φ]2) * Sin[ψ], δz * Cos[φ]};
      currentPoint = {oldPoint[[1]] + randomStep[[1]],
      oldPoint[[2]] + randomStep[[2]], oldPoint[[3]] + randomStep[[3]]};

      r = RandomReal[];
      Which[
        currentPoint[[3]] < 0 && currentOrder ≤ lowerCut, doS1[],
        currentPoint[[3]] < 0 && currentOrder > scatteringOrder, doS2[],
        currentPoint[[3]] < 0 && currentOrder > lowerCut &&
        currentOrder ≤ scatteringOrder && r > Ravg, doRef[],
        currentPoint[[3]] < 0 && currentOrder > lowerCut &&
        currentOrder ≤ scatteringOrder && r ≤ Ravg, doSpecR[],
        currentPoint[[3]] > thickness && r ≤ Ravg, doSpecT[],
        currentPoint[[3]] > thickness, doTra[]
      ];
      currentOrder++;
      oldPoint = currentPoint;
    ]
  ]
]

```

---

*In[ ]:=* **Calculation of the coherent  
backscattering (CBS) line shape**

```

In[ ]:= λ = 0.635;
(*Clearing the zeros that correspond to transmitted photons*)
a = DeleteCases[listr, 0];
b = DeleteCases[listα, 0];
c = DeleteCases[-listz, 0];
(*Coherent term*)
γc[θ_] := 
$$\sum_{i=1}^{\text{indexReflected}} \text{Exp}[-c[[i]]/\gamma z] * (1 - \text{Ravg}) * \text{Cos}\left[\frac{2\pi}{\lambda} a[[i]] * (\text{Sin}[b[[i]]] - \text{Sin}[b[[i]] + \theta])\right];$$

(*To normalise the CBS it is necessary to perform a simulation for semi-infinite media (we used OT=1000).
Simulations with different R requires different normalisations *)
CBS[θ_] := γc[θ];

```

---

## In[ ]:= Exporting the data for further analysis

```

θmin = 0.0;
θmax = 0.4;
θstep = 0.2/57;

θstepnumber = Ceiling[ $\frac{\theta_{\max} - \theta_{\min}}{\theta_{\text{step}}}$ ];
simulationData = Table[0, {θstepnumber}, {2}];
For[i = 1, i ≤ θstepnumber, i++,
  simulationData[[i, 1]] = N[θmin + (i - 1) * θstep];
  simulationData[[i, 2]] = CBS[θmin + (i - 1) * θstep];
]
(*Export["",simulationData,"Table"];*)

```
